# Supplementary material for: Malonyl-CoA is a conserved endogenous ATP-competitive mTORC1 inhibitor
Source: PubMed Central journal article supplement (PMC10495264; doi:10.1038/s41556-023-01198-6), 2023-08-10

Uncropped blots for Fig. 3a

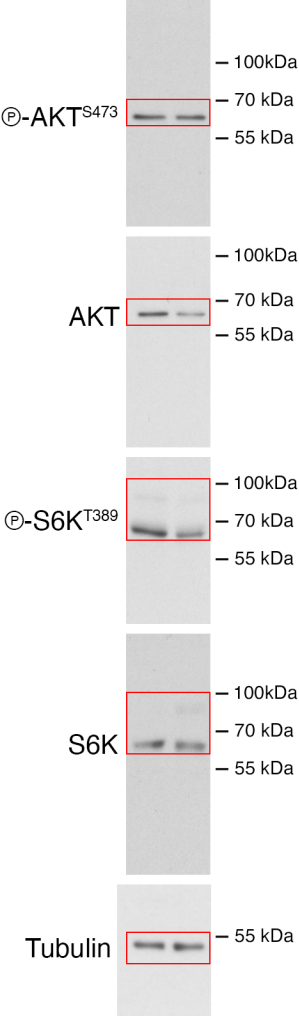

Uncropped blots for Fig. 3c

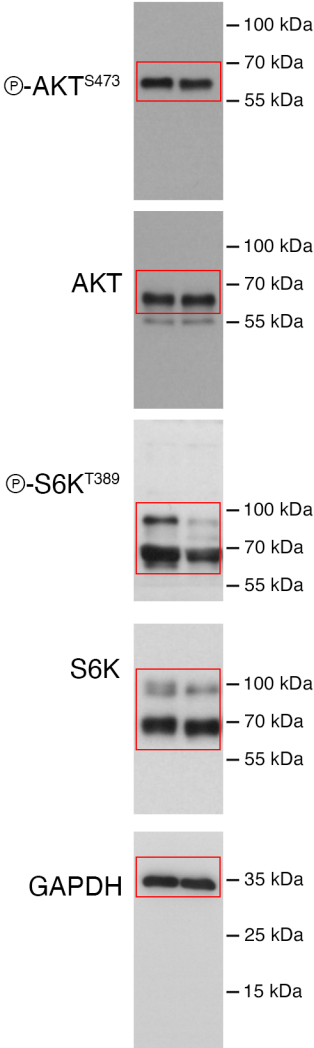

Uncropped blots for Fig. 3e

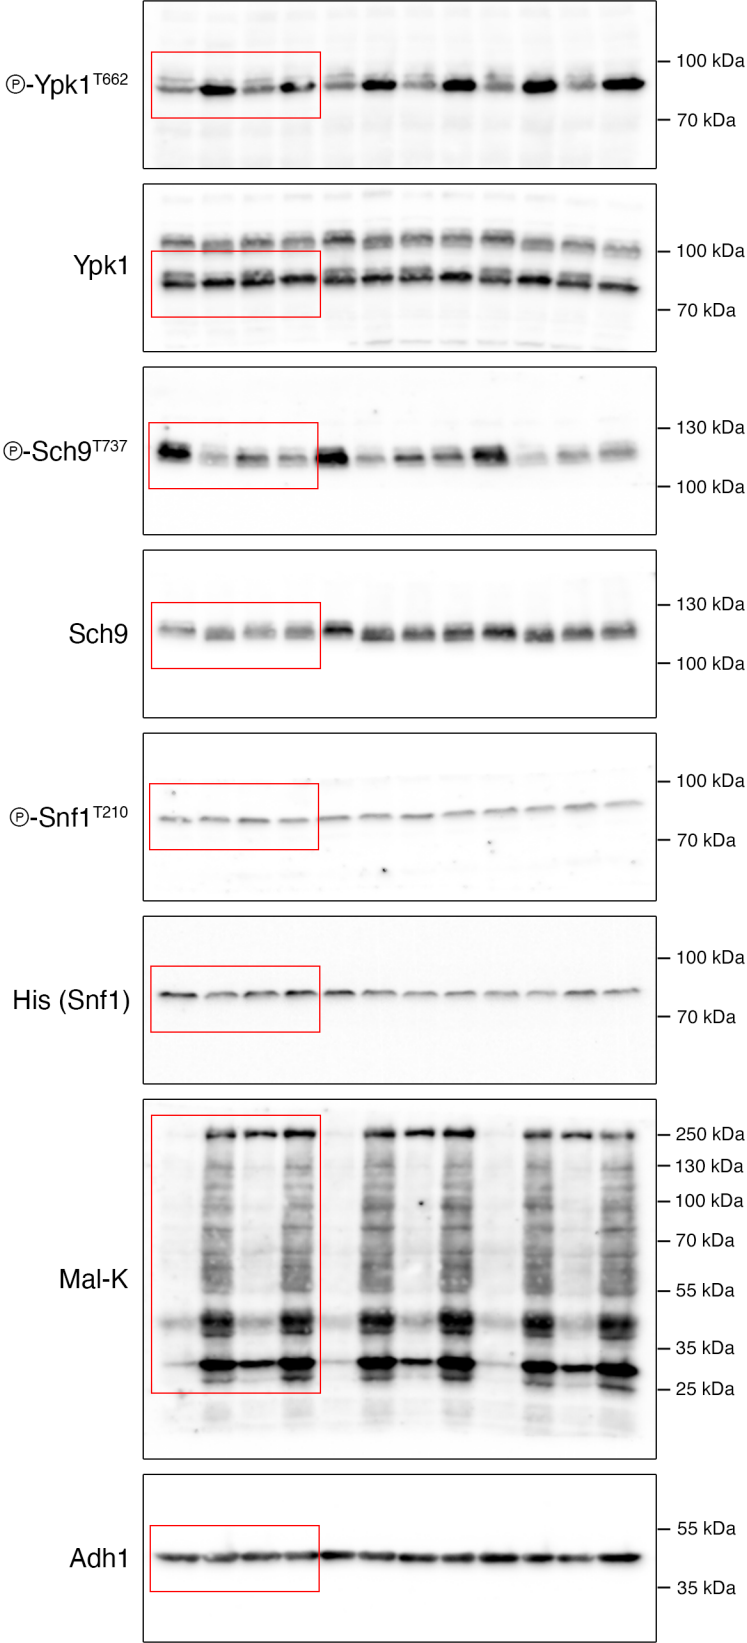

Uncropped blots for Fig. 3j

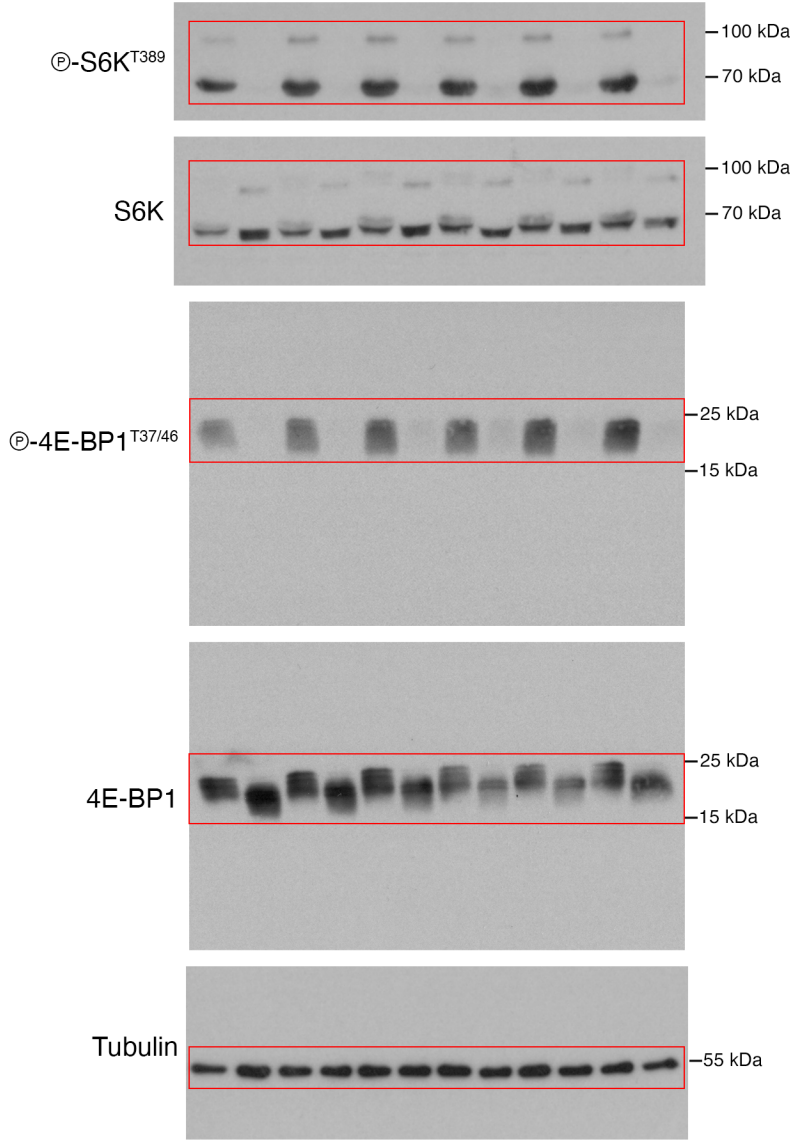

Supplement: 41556_2023_1198_MOESM9_ESM.pdf [file 41556_2023_1198_MOESM9_ESM.pdf]
