# Supplementary material for: Malonyl-CoA is a conserved endogenous ATP-competitive mTORC1 inhibitor
Source: PubMed Central journal article supplement (PMC10495264; doi:10.1038/s41556-023-01198-6), 2023-08-10

Uncropped blots for Extended Data Fig. 4a

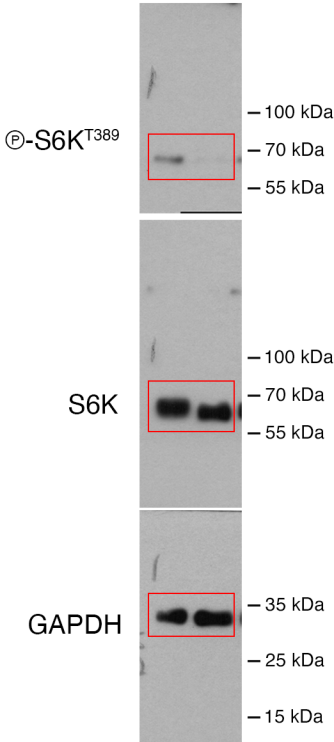

Uncropped blots for Extended Data Fig. 4c

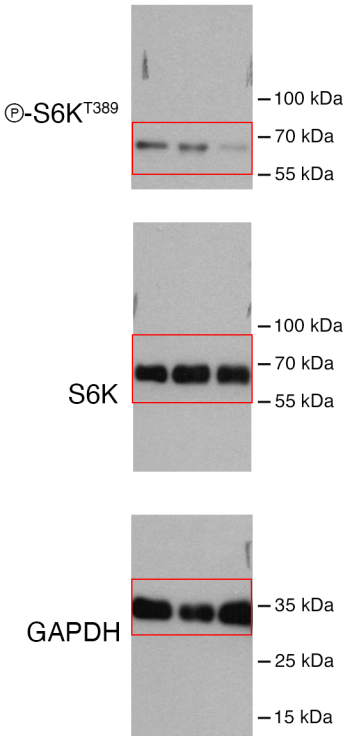

Uncropped blots for Extended Data Fig. 4d

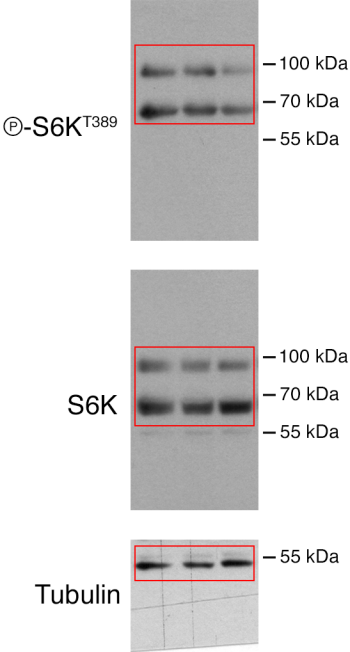

Uncropped blots for Extended Data Fig. 4f

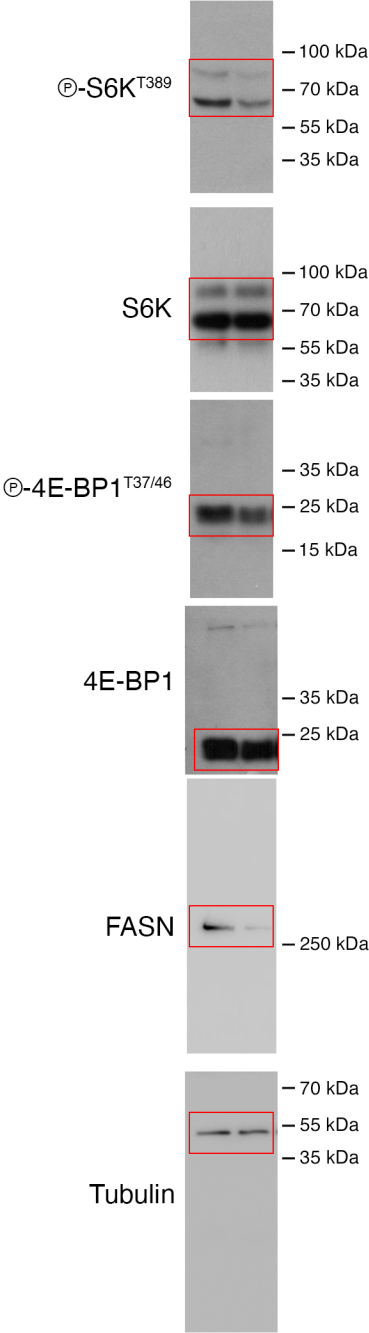

Uncropped blots for Extended Data Fig. 4h

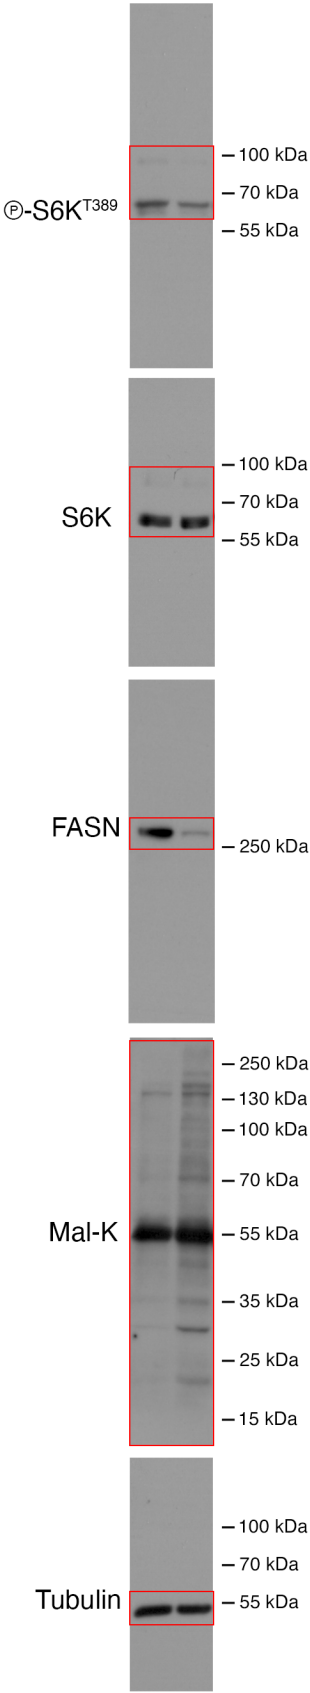

Uncropped blots for Extended Data Fig. 4j

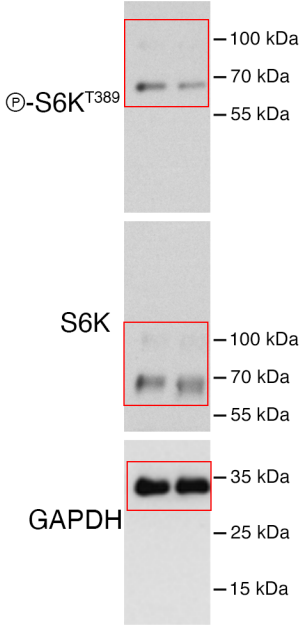

Uncropped blots for Extended Data Fig. 4k

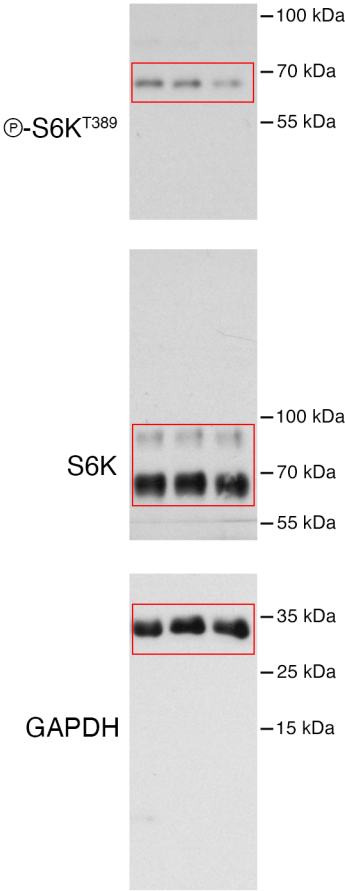

Uncropped blots for Extended Data Fig. 4m

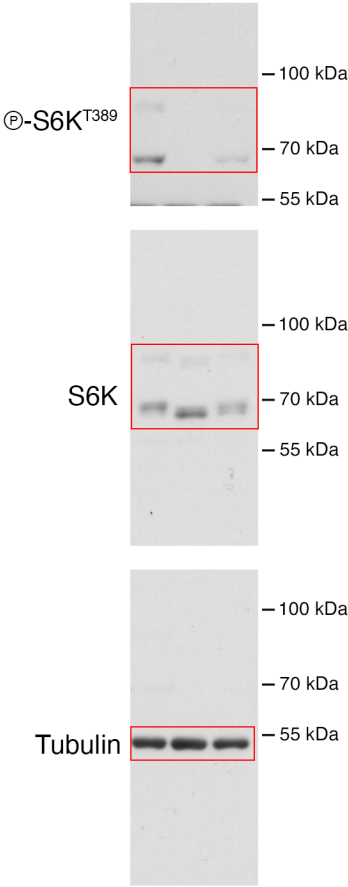



Uncropped blots for Extended Data Fig. 4o

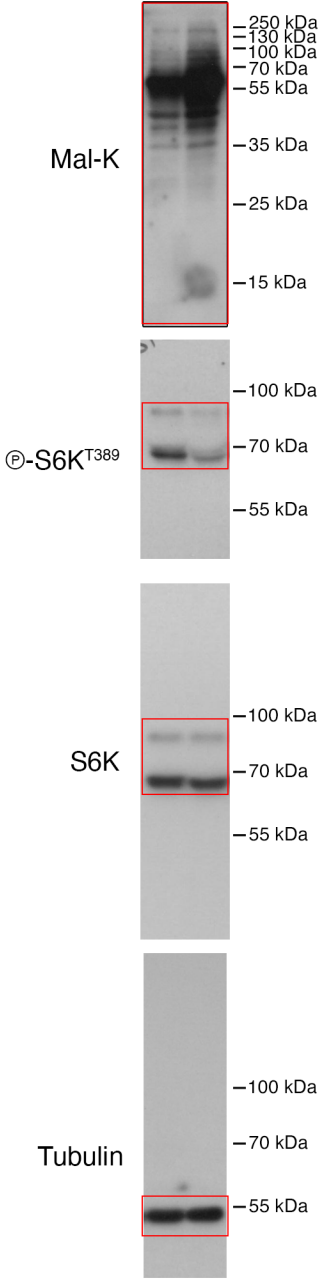

Supplement: 41556_2023_1198_MOESM17_ESM.pdf [file 41556_2023_1198_MOESM17_ESM.pdf]
