# Supplementary material for: Malonyl-CoA is a conserved endogenous ATP-competitive mTORC1 inhibitor
Source: PubMed Central journal article supplement (PMC10495264; doi:10.1038/s41556-023-01198-6), 2023-08-10

Uncropped blots for Extended Data Fig. 10b

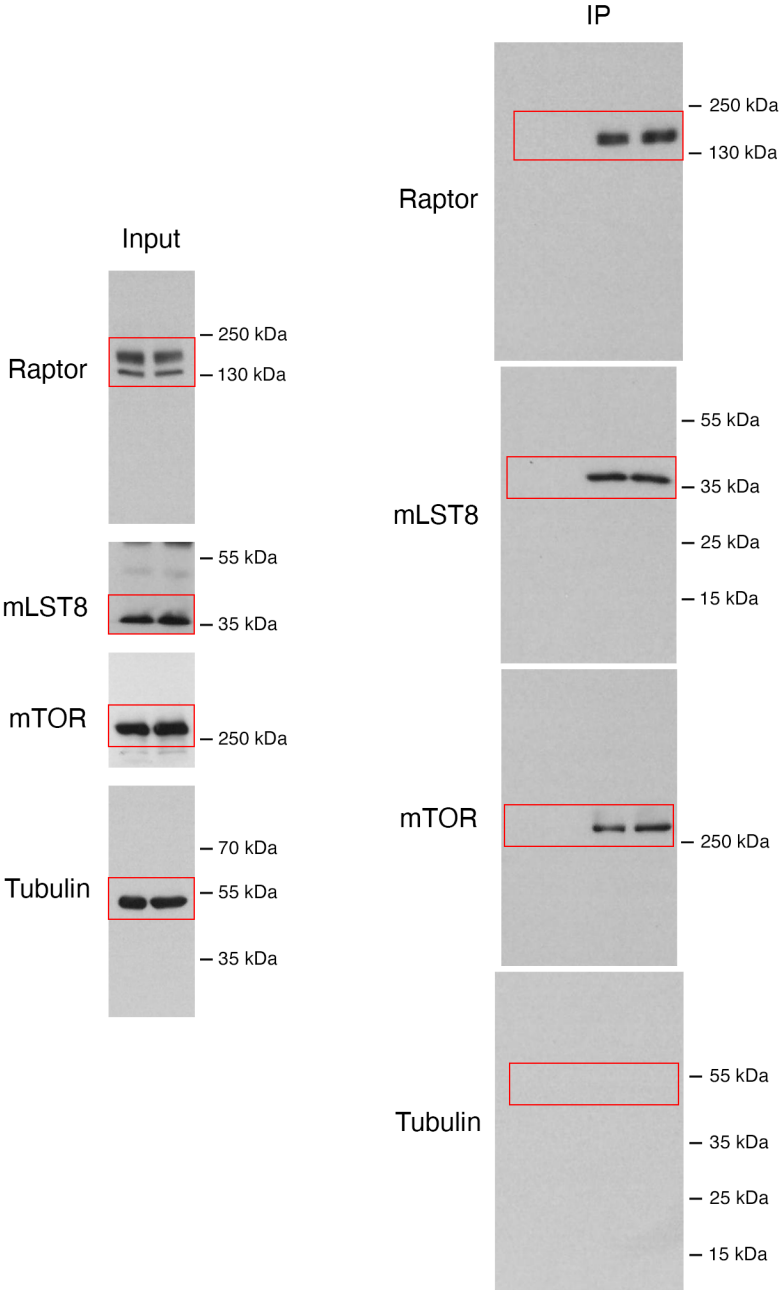

Uncropped blots for Extended Data Fig. 10c

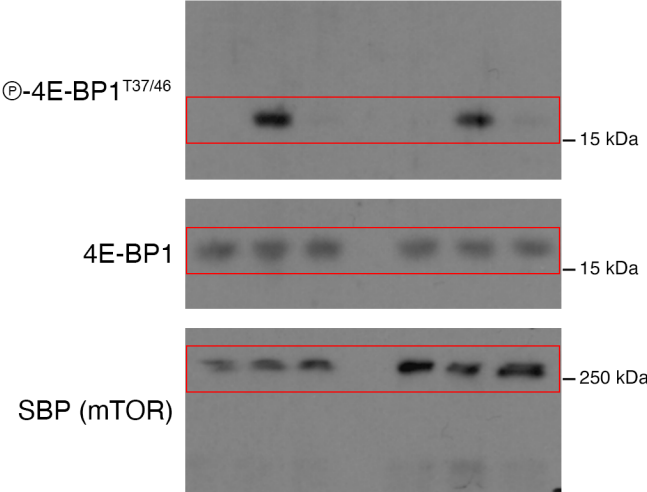

Uncropped blots for Extended Data Fig. 10d

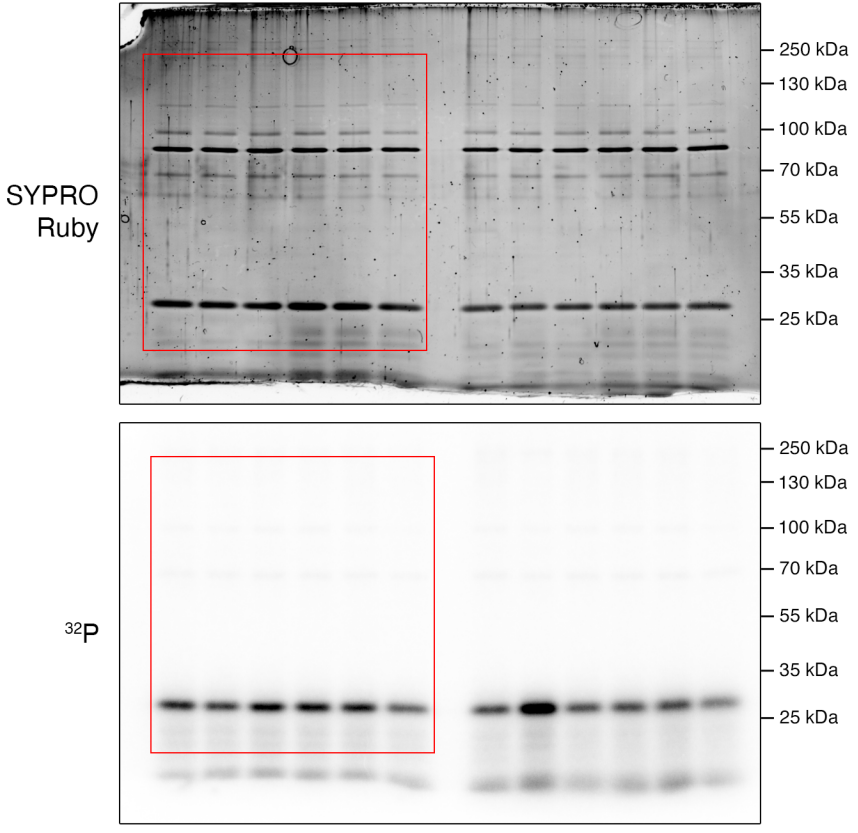

Uncropped blots for Extended Data Fig. 10f

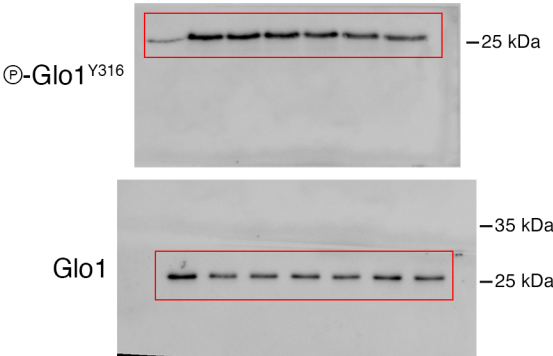

Uncropped blots for Extended Data Fig. 10h

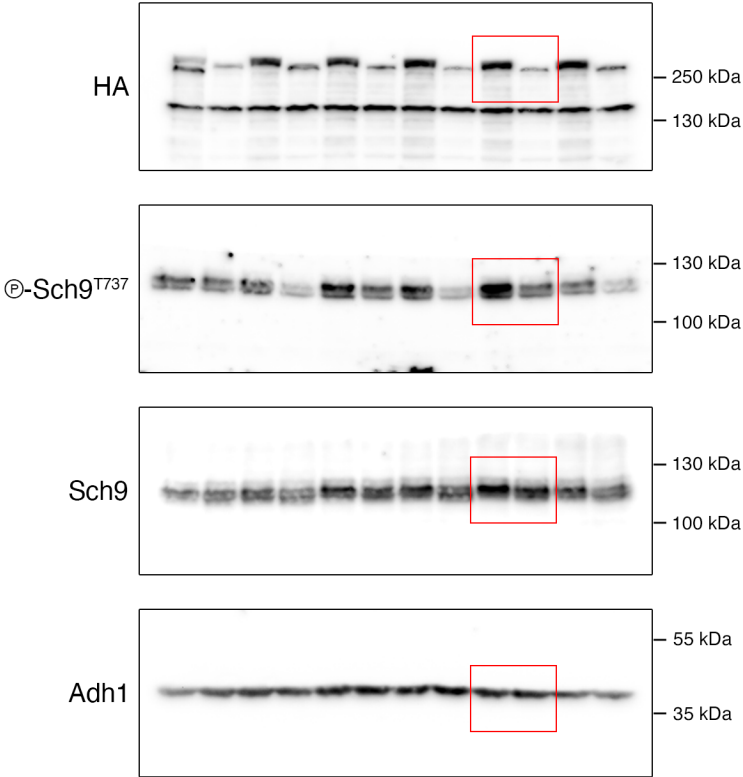

Uncropped blots for Extended Data Fig. 10j

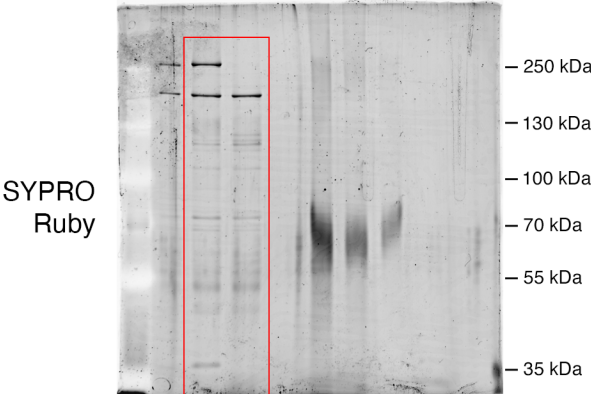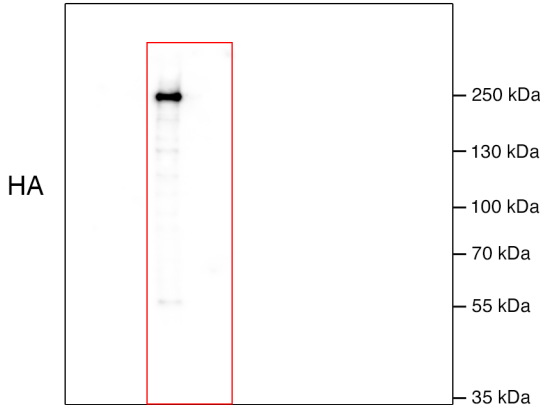

Uncropped blots for Extended Data Fig. 10k

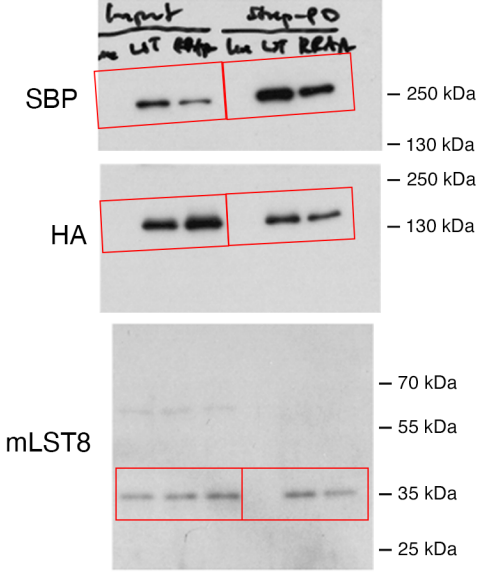

Uncropped blots for Extended Data Fig. 10I

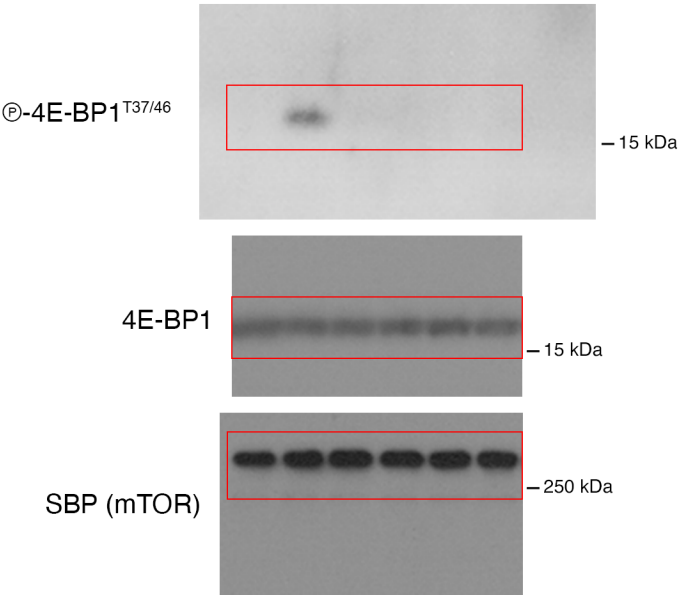

Supplement: 41556_2023_1198_MOESM22_ESM.pdf [file 41556_2023_1198_MOESM22_ESM.pdf]
